# Supplementary material
Source: PubMed Central journal article supplement (PMC4254441)
Supplement: NIHMS614971-supplement-01.pdf [file NIHMS614971-supplement-01.pdf]

18) If you have any of the above symptoms how long after being exposed do your other symptoms last?  
(specify symptom) Average \_\_\_\_\_ Earliest \_\_\_\_\_ Latest \_\_\_\_\_

19) How do you treat your attacks and is it effective? (ie medications, environmental changes)? \_\_\_\_\_

Have you ever needed to use epinephrine (an Epi-pen) for an attack? What were the conditions? \_\_\_\_\_

20) After your symptoms disappear do they reappear without a repeat exposure to the conditions that caused it?  
If yes specify the time delay and your symptom \_\_\_\_\_

21) How many attacks do you have Per Year? \_\_\_\_\_ Per Month? \_\_\_\_\_

22) How many days per year are you incapacitated by your condition? \_\_\_\_\_

23 a) Was your condition worse at any particular age? If yes, what age? \_\_\_\_\_

b) Better at any particular age? If yes, what age? \_\_\_\_\_

24 a) Have you seen a physician for this condition? \_\_\_\_\_

b) If yes, what is his/her name and telephone number? \_\_\_\_\_

25) Have you been hospitalized for this condition? \_\_\_\_\_

26 a) Have you had a cold timed skin test, exercise challenge, solar stimulation or other tests for hives in the past? \_\_\_\_\_

b) If yes, what was your result? \_\_\_\_\_

27 a) Have you ever had blood drawn during an attack? \_\_\_\_\_

b) If yes, where was the blood drawn? \_\_\_\_\_

28) How would you rate the severity of your condition? Circle the number that applies:

|      |   |   |          |   |   |   |        |   |   |    |
|------|---|---|----------|---|---|---|--------|---|---|----|
| 0    | 1 | 2 | 3        | 4 | 5 | 6 | 7      | 8 | 9 | 10 |
| mild |   |   | moderate |   |   |   | severe |   |   |    |

29) Do you or have you had a history of of seasonal nasal allergies “hayfever”, skin allergies, food allergies, eczema or drug allergies? If yes which ones \_\_\_\_\_

30 a) What reaction, if any, have you had to insect bites? \_\_\_\_\_

b) To bee stings? \_\_\_\_\_

c) Did your condition worsen after these bites or stings? \_\_\_\_\_

31 a) Do you have a history of blood transfusions? If yes, was it before or after your symptoms started? \_\_\_\_\_

b) If your transfusion was after your symptoms started did your symptoms worsen after it? \_\_\_\_\_

32) Do you have a personal history of? (circle all that apply)

Tobacco use      Hepatitis C      Mononucleosis (EBV infection)      Leukocytoclastic Vasculitis  
Cryoglobulinemia      Lymphosarcoma      Syphilis      Rubeola      HIV      Chicken Pox      Singles

33) Have you in the past or currently use any of the following (circle all that apply)?

a) Penicillin      Other antibiotics \_\_\_\_\_

b) Ace Inhibitors (commonly end in “pril”) \_\_\_\_\_

c) Angiotensin Receptor Blockers (commonly end in “sartan”) \_\_\_\_\_

d) Griseofulvin \_\_\_\_\_

34) Other medical conditions \_\_\_\_\_

35) Current Medications \_\_\_\_\_

36) Do you have any blood related family members with a history of (circle all that apply)

Autoimmune diseases (Rheumatoid arthritis, Lupus, Vasculitis or other)

Itching/Hives      Swelling of body parts      Unexplained death or illness

Early infant deaths      Multiple miscarriages
